# Supplementary material
Source: HighWire-hosted journal article supplement (https://www.cmaj.ca/highwire/filestream/74422/field_highwire_adjunct_files/0/190595-com-1-at.pdf)
Supplement: 190595-com-1-at.pdf [file 190595-com-1-at.pdf]

**Appendix 1 (as submitted by the authors): The Primary Health Care Integration Network**

# Primary Health Care Integration Network Strategic Clinical Network 3 Year Plan

Keeping Albertan’s well in their communities — on their terms.

We work with partners, patients and families across the healthcare system.

We help providers and social-support organizations become more coordinated.

Through integration across the healthcare system, we will improve continuity of care for Albertans and help give patients the most appropriate care as close to home as possible

**PRIORITIES:**

**System Foundation for Integration**

**Keeping Care in the Community**

**Linking to Specialists & Back**

**Home to Hospital to Home**

**ACTIONS:**

- 1. Find & share leading practices to achieve integration across Alberta
- 2. Collaboratively seek solutions for current integration problems
- 3. Accelerate spread and scale of initiatives to achieve significant system improvement
- 4. Advance innovation to create the health neighbourhood
